# Supplementary material for: Impact of risk factors for major cardiovascular diseases: a comparison of life-time observational and Mendelian randomisation findings
Source: PubMed Central journal article supplement (PMC8438838; doi:10.1136/openhrt-2021-001735), 2021-09-13
Supplement: openhrt-2021-001735supp001.pdf [file openhrt-2021-001735supp001.pdf]

**SUPPLEMENTAL MATERIALS****THE IMPACT OF RISK FACTORS FOR MAJOR CARDIOVASCULAR DISEASES  
- A COMPARISON OF LIFE-TIME OBSERVATIONAL AND MENDELIAN  
RANDOMIZATION FINDINGS**

Lars Lind, Martin Ingelsson, Johan Sundström, Johan Ärnlöv

**Contents**

|                                   |          |
|-----------------------------------|----------|
| <b>Supplementary Table 1.....</b> | <b>2</b> |
| <b>Supplementary Table 2.....</b> | <b>4</b> |
| <b>Supplementary Table 3.....</b> | <b>6</b> |
| <b>Supplementary Table 4.....</b> | <b>8</b> |

**Supplementary Table 1. Sensitivity Mendelian randomization analyses of associations of risk factors with coronary heart disease.** MR Egger estimates are given both for a univariate (risk factors analyzed one by one) and a multivariate model (including all risk factors in the same model). Number of independent SNPs used as instruments is given in parenthesis for each risk factor.

|                             | Test            | Estimate | 95%CI<br>lower | 95%CI<br>higher | P-value |
|-----------------------------|-----------------|----------|----------------|-----------------|---------|
| <b>Smoking (n=97)</b>       |                 |          |                |                 |         |
| Univariate                  | MR Egger        | 2.98     | 0.93           | 9.51            | 0.064   |
| Univariate                  | Weighted median | 2.32     | 1.62           | 3.34            | <0.0001 |
| Univariate                  | Heterogeneity   | Q=107    |                |                 | 0.15    |
| Multivariate                | MR Egger        | 1.55     | 1.15           | 2.09            | 0.0043  |
| <b>Diabetes (n=40)</b>      |                 |          |                |                 |         |
| Univariate                  | MR Egger        | 1.39     | 1.07           | 1.80            | 0.013   |
| Univariate                  | Weighted median | 1.13     | 1.06           | 1.21            | 0.00031 |
| Univariate                  | Heterogeneity   | Q=89     |                |                 | 0.0001  |
| Multivariate                | MR Egger        | 1.07     | 1.02           | 1.13            | 0.010   |
| <b>BMI (N=79)</b>           |                 |          |                |                 |         |
| Univariate                  | MR Egger        | 1.56     | 1.22           | 1.99            | 0.00034 |
| Univariate                  | Weighted median | 1.49     | 1.29           | 1.72            | <0.0001 |
| Univariate                  | Heterogeneity   | Q=103    |                |                 | 0.018   |
| Multivariate                | MR Egger        | 1.18     | 1.06           | 1.32            | 0.0021  |
| <b>HDL (n=84)</b>           |                 |          |                |                 |         |
| Univariate                  | MR Egger        | 1.01     | .085           | 1.20            | 0.91    |
| Univariate                  | Weighted median | 0.92     | 0.83           | 1.03            | 0.16    |
| Univariate                  | Heterogeneity   | Q=279    |                |                 | <0.0001 |
| Multivariate                | MR Egger        | 0.93     | 0.84           | 1.04            | 0.21    |
| <b>Triglycerides (n=51)</b> |                 |          |                |                 |         |
| Univariate                  | MR Egger        | 1.10     | 0.94           | 1.29            | 0.24    |
| Univariate                  | Weighted median | 1.21     | 1.08           | 1.35            | 0.00069 |
| Univariate                  | Heterogeneity   | Q=144    |                |                 | <0.0001 |
| Multivariate                | MR Egger        | 1.03     | 0.90           | 1.18            | 0.64    |

| <b>LDL (n=76)</b>                      |                 |       |      |      |         |
|----------------------------------------|-----------------|-------|------|------|---------|
| Univariate                             | MR Egger        | 1.54  | 1.36 | 1.75 | <0.0001 |
| Univariate                             | Weighted median | 1.52  | 1.40 | 1.66 | <0.0001 |
| Univariate                             | Heterogeneity   | Q=245 |      |      | <0.0001 |
| Multivariate                           | MR Egger        | 1.36  | 1.25 | 1.48 | <0.0001 |
| <b>Systolic blood pressure (n=228)</b> |                 |       |      |      |         |
| Univariate                             | MR Egger        | 1.03  | 1.01 | 1.06 | 0.0049  |
| Univariate                             | Weighted median | 1.03  | 1.03 | 1.04 | <0.0001 |
| Univariate                             | Heterogeneity   | Q=488 |      |      | <0.0001 |
| Multivariate                           | MR Egger        | 1.03  | 1.02 | 1.04 | <0.0001 |

**Supplementary Table 2. Sensitivity Mendelian randomization analyses of associations of risk factors with ischemic stroke.** MR Egger estimates are given both for a univariate (risk factors analyzed one by one) and a multivariate model (including all risk factors in the same model). Number of independent SNPs used as instruments is given in parenthesis for each risk factor.

|                             | Test            | Estimate | 95%CI<br>lower | 95%CI<br>higher | P-value |
|-----------------------------|-----------------|----------|----------------|-----------------|---------|
| <b>Smoking (n=97)</b>       |                 |          |                |                 |         |
| Univariate                  | MR Egger        | 1.33     | 0.48           | 3.69            | 0.57    |
| Univariate                  | Weighted median | 1.52     | 1.11           | 2.07            | 0.0084  |
| Univariate                  | Heterogeneity   | Q=150    |                |                 | 0.0635  |
| Multivariate                | MR Egger        | 1.50     | 1.12           | 2.01            | 0.0059  |
| <b>Diabetes (n=42)</b>      |                 |          |                |                 |         |
| Univariate                  | MR Egger        | 1.17     | 0.94           | 1.47            | 0.16    |
| Univariate                  | Weighted median | 1.17     | 1.10           | 1.25            | <0.0001 |
| Univariate                  | Heterogeneity   | Q=70     |                |                 | 0.0022  |
| Multivariate                | MR Egger        | 1.07     | 1.02           | 1.13            | 0.011   |
| <b>BMI (n=78)</b>           |                 |          |                |                 |         |
| Univariate                  | MR Egger        | 0.96     | 0.72           | 1.28            | 0.79    |
| Univariate                  | Weighted median | 1.07     | 0.92           | 1.25            | 0.35    |
| Univariate                  | Heterogeneity   | Q=130    |                |                 | 0.0001  |
| Multivariate                | MR Egger        | 0.99     | 0.89           | 1.10            | 0.80    |
| <b>HDL (n=87)</b>           |                 |          |                |                 |         |
| Univariate                  | MR Egger        | 1.13     | 1.01           | 1.27            | 0.047   |
| Univariate                  | Weighted median | 1.01     | 0.93           | 1.10            | 0.81    |
| Univariate                  | Heterogeneity   | Q=122    |                |                 | 0.0057  |
| Multivariate                | MR Egger        | 0.97     | 0.87           | 1.07            | 0.51    |
| <b>Triglycerides (n=53)</b> |                 |          |                |                 |         |
| Univariate                  | MR Egger        | 0.95     | 0.84           | 1.07            | 0.37    |
| Univariate                  | Weighted median | 1.01     | 0.91           | 1.10            | 0.91    |
| Univariate                  | Heterogeneity   | Q=61     |                |                 | 0.14    |
| Multivariate                | MR Egger        | 1.02     | 0.90           | 1.16            | 0.73    |

| <b>LDL (n=77)</b>                      |                 |       |      |      |         |
|----------------------------------------|-----------------|-------|------|------|---------|
| Univariate                             | MR Egger        | 1.17  | 1.06 | 1.29 | 0.0017  |
| Univariate                             | Weighted median | 1.12  | 1.03 | 1.21 | 0.0047  |
| Univariate                             | Heterogeneity   | Q=145 |      |      | <0.0001 |
| Multivariate                           | MR Egger        | 1.02  | 0.94 | 1.11 | 0.60    |
| <b>Systolic blood pressure (n=229)</b> |                 |       |      |      |         |
| Univariate                             | MR Egger        | 1.03  | 1.01 | 1.05 | 0.019   |
| Univariate                             | Weighted median | 1.03  | 1.02 | 1.03 | <0.0001 |
| Univariate                             | Heterogeneity   | Q=342 |      |      | <0.0001 |
| Multivariate                           | MR Egger        | 1.02  | 1.02 | 1.03 | <0.0001 |

**Supplementary Table 3. Sensitivity Mendelian randomization analyses of associations of risk factors with heart failure.** MR Egger estimates are given both for a univariate (risk factors analyzed one by one) and a multivariate model (including all risk factors in the same model). Number of independent SNPs used as instruments is given in parenthesis for each risk factor.

|                             | Test            | Estimate | 95%CI<br>lower | 95%CI<br>higher | P-value |
|-----------------------------|-----------------|----------|----------------|-----------------|---------|
| <b>Smoking (n=123)</b>      |                 |          |                |                 |         |
| Univariate                  | MR Egger        | 1.48     | 0.63           | 3.50            | 0.36    |
| Univariate                  | Weighted median | 1.86     | 1.43           | 2.41            | <0.0001 |
| Univariate                  | Heterogeneity   | Q=164    |                |                 | 0.0051  |
| Multivariate                | MR Egger        | 1.28     | 1.05           | 1.57            | 0.016   |
| <b>Diabetes (n=42)</b>      |                 |          |                |                 |         |
| Univariate                  | MR Egger        | 1.07     | 0.91           | 1.26            | 0.40    |
| Univariate                  | Weighted median | 1.07     | 1.02           | 1.12            | 0.0051  |
| Univariate                  | Heterogeneity   | Q=73     |                |                 | 0.0010  |
| Multivariate                | MR Egger        | 1.05     | 1.02           | 1.08            | 0.0011  |
| <b>BMI (n=78)</b>           |                 |          |                |                 |         |
| Univariate                  | MR Egger        | 1.57     | 1.21           | 2.03            | 0.00057 |
| Univariate                  | Weighted median | 1.67     | 1.46           | 1.92            | <0.0001 |
| Univariate                  | Heterogeneity   | Q=167    |                |                 | <0.0001 |
| Multivariate                | MR Egger        | 1.57     | 1.46           | 1.68            | <0.0001 |
| <b>HDL (n=86)</b>           |                 |          |                |                 |         |
| Univariate                  | MR Egger        | 0.94     | 0.84           | 1.06            | 0.33    |
| Univariate                  | Weighted median | 0.94     | 0.87           | 1.02            | 0.14    |
| Univariate                  | Heterogeneity   | Q=189    |                |                 | <0.0001 |
| Multivariate                | MR Egger        | 0.98     | 0.92           | 1.06            | 0.67    |
| <b>Triglycerides (n=53)</b> |                 |          |                |                 |         |
| Univariate                  | MR Egger        | 1.17     | 1.05           | 1.31            | 0.0055  |
| Univariate                  | Weighted median | 1.16     | 1.07           | 1.25            | 0.00038 |
| Univariate                  | Heterogeneity   | Q=91     |                |                 | 0.0004  |
| Multivariate                | MR Egger        | 1.02     | 0.93           | 1.12            | 0.65    |

| <b>LDL (n=77)</b>                      |                 |       |      |      |         |
|----------------------------------------|-----------------|-------|------|------|---------|
| Univariate                             | MR Egger        | 1.11  | 1.02 | 1.21 | 0.012   |
| Univariate                             | Weighted median | 1.10  | 1.01 | 1.2  | 0.023   |
| Univariate                             | Heterogeneity   | Q=198 |      |      | <0.0001 |
| Multivariate                           | MR Egger        | 1.02  | 0.96 | 1.08 | 0.54    |
| <b>Systolic blood pressure (n=231)</b> |                 |       |      |      |         |
| Univariate                             | MR Egger        | 1.02  | 0.99 | 1.03 | 0.068   |
| Univariate                             | Weighted median | 1.02  | 1.01 | 1.03 | <0.0001 |
| Univariate                             | Heterogeneity   | Q=361 |      |      | <0.0001 |
| Multivariate                           | MR Egger        | 1.02  | 1.01 | 1.02 | <0.0001 |

**Supplementary Table 4. Sensitivity Mendelian randomization analyses of associations of risk factors with atrial fibrillation.** MR Egger estimates are given both for a univariate (risk factors analyzed one by one) and a multivariate model (including all risk factors in the same model). Number of independent SNPs used as instruments is given in parenthesis for each risk factor.

|                             | Test            | Estimate | 95%CI<br>lower | 95%CI<br>higher | P-value |
|-----------------------------|-----------------|----------|----------------|-----------------|---------|
| <b>Smoking (n=125)</b>      |                 |          |                |                 |         |
| Univariate                  | MR Egger        | 1.61     | 0.70           | 3.69            | 0.26    |
| Univariate                  | Weighted median | 1.01     | 0.79           | 1.29            | 0.91    |
| Univariate                  | Heterogeneity   | Q=190    |                |                 | 0.0001  |
| Multivariate                | MR Egger        | 1.14     | 0.88           | 1.47            | 0.33    |
| <b>Diabetes (n=42)</b>      |                 |          |                |                 |         |
| Univariate                  | MR Egger        | 0.99     | 0.86           | 1.13            | 0.85    |
| Univariate                  | Weighted median | 0.98     | 0.94           | 1.03            | 0.43    |
| Univariate                  | Heterogeneity   | Q=59     |                |                 | 0.024   |
| Multivariate                | MR Egger        | 0.96     | 0.92           | 1.01            | 0.12    |
| <b>BMI (n=77)</b>           |                 |          |                |                 |         |
| Univariate                  | MR Egger        | 1.16     | 0.96           | 1.39            | 0.11    |
| Univariate                  | Weighted median | 1.35     | 1.21           | 1.52            | <0.0001 |
| Univariate                  | Heterogeneity   | Q=100    |                |                 | 0.029   |
| Multivariate                | MR Egger        | 1.23     | 1.12           | 1.35            | <0.0001 |
| <b>HDL (n=86)</b>           |                 |          |                |                 |         |
| Univariate                  | MR Egger        | 1.01     | 0.92           | 1.12            | 0.79    |
| Univariate                  | Weighted median | 0.99     | 0.93           | 1.06            | 0.83    |
| Univariate                  | Heterogeneity   | Q=168    |                |                 | 0.0001  |
| Multivariate                | MR Egger        | 0.92     | 0.84           | 1.01            | 0.077   |
| <b>Triglycerides (n=51)</b> |                 |          |                |                 |         |
| Univariate                  | MR Egger        | 1.04     | 0.91           | 1.18            | 0.55    |
| Univariate                  | Weighted median | 0.98     | 0.91           | 1.06            | 0.61    |
| Univariate                  | Heterogeneity   | Q=157    |                |                 | <0.0001 |
| Multivariate                | MR Egger        | 0.93     | 0.83           | 1.04            | 0.20    |



| <b>LDL (n=79)</b>                      |                 |       |      |      |         |
|----------------------------------------|-----------------|-------|------|------|---------|
| Univariate                             | MR Egger        | 1.03  | 0.96 | 1.10 | 0.38    |
| Univariate                             | Weighted median | 0.97  | 0.92 | 1.03 | 0.33    |
| Univariate                             | Heterogeneity   | Q=141 |      |      | <0.0001 |
| Multivariate                           | MR Egger        | 1.01  | 0.94 | 1.08 | 0.83    |
| <b>Systolic blood pressure (n=231)</b> |                 |       |      |      |         |
| Univariate                             | MR Egger        | 1.01  | 0.98 | 1.02 | 0.93    |
| Univariate                             | Weighted median | 1.01  | 1.01 | 1.02 | <0.0001 |
| Univariate                             | Heterogeneity   | Q=442 |      |      | <0.0001 |
| Multivariate                           | MR Egger        | 1.01  | 1.00 | 1.01 | 0.0055  |
